# Supplementary material for: Sediment loading in Fennoscandia during the last glacial cycle
Source: Copernicus journal article supplement (doi:10.5194/se-2017-18), 2017-02-28
Supplement: Supplementary file [file se-2017-18-AC5-supplement.pdf]

# Effect of ~~S~~ediment loading in Fennoscandia and the Barents Sea during the last glacial cycle on GIA observations

Wouter van der Wal<sup>1</sup>, Thijs Ijpelaar<sup>2</sup>

<sup>1</sup>Faculty of Aerospace Engineering, Delft University of Technology, Delft, 2613 DH, Netherlands

5 <sup>2</sup>s Hertogenbosch, 5211 TL, Netherlands

*Correspondence to:* Wouter van der Wal (w.vanderwal@tudelft.nl)

## Abstract

Models for ~~postglacial rebound, or~~ Glacial Isostatic Adjustment (GIA) routinely include the effects of meltwater  
10 redistribution and changes in topography and coastlines. Since the sediment transport related to the dynamics of ice sheets  
may be comparable to that of sea level rise in terms of surface pressure, the loading effect of sediment deposition could  
cause measurable ongoing viscous readjustment. Here we study the loading effect of glacial induced sediment redistribution  
(GISR) related to the Weichselian ice sheet in Fennoscandia and the Barents Sea. The surface loading effect and its effect on  
15 the gravitational potential is modelled by including changes in sediment thickness in the sea level equation following the  
method of Dalca et al. (2013). Sediment displacement estimates are estimated in two different ways: (i) from a compilation  
of studies on ~~smaller-local~~ features: through mouth fans, large scale failure and basin flux and (ii) from output of a coupled  
ice-sediment model. To account for uncertainty in Earth's rheology three viscosity profiles are used.

It is found that sediment transport can lead to changes in relative sea level of ~~at most several~~ up to 2 meters in the last 6000  
years with and the largerst effects occurring earlier in the deglaciation. This magnitude is below the error level of most of the  
20 relative sea level data because those data are sparse and errors ~~are larger for older data~~ increase with length of time before  
present. The ~~maximum~~ effect on present-day uplift rates ~~is reaches~~ a few tenths of mm yr<sup>-1</sup> in large parts of Norway and  
Sweden, which is around the measurement error of long-term ~~GPS-GNSS~~ (Global Navigation Satellite System) monitoring  
networks. The maximum effect on present-day gravity rates as measured by the GRACE (Gravity Recovery and Climate  
Experiment) satellite mission is up to tenths of  $\mu\text{Gal yr}^{-1}$ , which is larger than the measurement error but below other error  
25 sources. Since GISR causes systematic uplift in most mainland Scandinavia, including GISR in GIA models would improve  
interpretation of ~~GPS-GNSS~~ and GRACE observations there.

## 1. Introduction

Erosion in glaciated areas ~~can beis~~ larger than in non-glaciated regions (Hallet et al., 1996, Amantov et al. 2011 and  
references therein), and estimates for sediment deposition in glaciated regions vary from millimeters per year to centimeters  
30 per year close to glaciers (Elverhoi 1984; Finlayson 2012), which is comparable to global changes in relative sea level during

the last glacial cycle (Fairbanks 1989). Similarly to sea-level change, sedimentation rates are enhanced during deglaciation when run-off is larger (e.g. Tucker and Slingerland 1997, Ivins et al. 2007). These changes in surface loading can lead to changes in sea level and the Earth's solid surface during thousands of years because of visco-elastic relaxation driven by the mantle viscosity. This raises the question whether erosion and sedimentation that is enhanced during deglaciation affects present-day GIA measurements. The loading effects of meltwater redistribution are routinely included in models of Glacial Isostatic Adjustment (GIA), but the loading effect of sediment transport is not. Of course, total sea level change is a global effect while sediment transport is a more local effect and displaced meltwater volume is much larger than the displaced sediment. On the other hand, sediment density is higher than water density, and effects of sediment transport during the last glacial cycle could influence present-day GIA measurements.

Several studies investigated the viscous response due to variation in past sedimentation rates. Ivins et al (2007) force their surface loading model with an estimate of postglacial sedimentation rates of 10 mm/year, compared to a background sedimentation rate over a glacial cycle of 1 mm/year. Their modelling predicted present-day subsidence of 1-8 mm/year although a more recent estimate reduces that amount to 0.5 mm yr<sup>-1</sup> (Wolstencroft et al., 2014). Viscoelastic relaxation due to sediment deposition in the Indus River basin and Arabian Sea has been shown known to cause changes in relative sea-level of up to 2 meters over 4000 years present day subsidence rates in the Arabian Sea and the Indus River basin (Ferrier et al., 2014). The effect is larger when the entire glacial cycle is considered, which is relevant when sea level data near the deltas are used to constrain global melt water volume (Ferrier et al. 2015), and also the Gulf of Mexico (Ivins et al., 2007; Simms et al., 2013) although a recent estimate reduces that amount to 0.5 mm yr<sup>-1</sup> (Wolstencroft et al., 2014).

While the aforementioned studies focused on sediment loading near river deltas far away from glaciated areas, With the large amount of sediment transport involved in glacier growth and melt it is possible that some of the could also induce palaeo sea level changes and -present-day observed- vertical motion near previously glaciated areas. We refer to material displaced by glacier growth and melt -is caused by past as glacial induced sediment redistribution (GISR)- rather than changes in ice or water load in the last glacial cycle. The -When present-day observations are used to invert for -infer viscosity or for ice thickness in GIA models which means- those inferences could be biased when GISR is not taken into account. The objective of this paper is to find out what is the effect of GISR during the Weichselian on GIA observables in Fennoscandia including the Barents Sea. The interest in this region stems from the fact that glacial sediment transport is large there (Elverhoi, 1984). The last 2,5 million years of glacial erosion resulted in a sediment layer of several kilometre thickness (Riis and Fjeldskaar 1992; Dowdeswell et al., 1996) with the last glaciation depositing sediment layers up to hundreds of meters thickness (Elverhoi 1984). and s. Moreover, several observations of sediment deposition are available (e.g. Dowdeswell et al., 1996) from which the loading can be quantified (e.g. Dowdeswell 1996; Taylor et al. 2002). Here, the focus is on present-day uplift and gravity rate of changes, and relative palaeo sea level data, which are routinely used to constrain GIA models.

Models exist which ~~couple-compute~~ the sediment displacement ~~as a result of to~~ the movement of glaciers (e.g. Boulton 1996; de Winter et al., 2012), but since the ice sheet thickness, as in most GIA models, is not a dynamic model component, erosion is not coupled to the changes in ice thickness in this study. Instead, the amount of GISR is derived from literature on observed sediment deposits and reported output from a coupled ice-sediment model. Sediment being deposited in the ocean will not only induce vertical motion, but also displace water and affect the gravity field. To model this effect we use the methodology of Dalca et al., (2013) to include sediment redistribution in the sea-level equation in a self-consistent way. Dalca et al., (2013) show that ~~ignoring the the relative effect of~~ time-varying ocean load resulting from sediment redistribution can ~~result in errors in relative sea level (RSL) be of~~ up to 40% ~~in terms of relative sea level~~. The method will be discussed briefly in Sect. 2. After that, it is explained how different estimates of GISR are created. Next, sea level change, ~~and uplift-deformation~~ rates ~~and gravity rates~~ are calculated for the different sediment transport scenarios and conclusions are drawn about the relevance of GISR in explaining GIA observations.

## 2. Method

The loading effect of ice and meltwater are routinely included in GIA models. The so-called sea-level equation is solved, which computes the sea-level distribution that accompanies a change in ice volume and corresponding changes in the Earth's shape and gravitational potential field (Farrell and Clark 1976; Mitrovica and Peltier 1991). The effect of sediments can also be included in the sea-level equation, as shown by Dalca et al., (2013). Here we follow Dalca et al., (2013), Kendall et al., (2005) and references therein. Only the key elements will be repeated here and some small differences will be pointed out.

Defining the sea level as the difference between the equipotential corresponding to sea-level and the solid surface. ~~The~~ sea level ~~equation (SL)~~ is ~~written given by~~

$$SL = G - (R + H + I), \quad (1)$$

where  $G$  is the height of the equipotential surface coinciding with the sea level,  $R$  is the height of the Earth's crust,  $H$  is the thickness of sediments,  $I$  is the thickness of ice masses supported by land. The aim is to compute the changes in sea level

$$\Delta SL = \Delta G - (\Delta R - \Delta H - \Delta I) \quad (2)$$

as a result of a changes in ~~The~~ total surface mass load  $L$ , which is defined as the sum of the changes in mass of water, ice and sediment:

$$\Delta L = \rho_w \Delta S + \rho_I \Delta I + \rho_H \Delta H, \quad (3)$$

where  $\rho_w$ ,  $\rho_I$ ,  $\rho_H$  are the respective densities and  $S$  is the ocean thickness. Computing the change in sea level -  $\Delta SL$  requires the change in equipotential surface and the solid Earth displacement which themselves depend on the change in sea level. The solution requires solving an integral equation which is usually done with an iterative approach. To solve the sea

level equation (2), loading changes are discretized at time steps of typically 1000 years. Two aspects need to be included to assure accurate representation of surface loads.

First, a check is performed At each time step  $j$  a check is performed to see whether ice is grounded or not by requiring that the ice starts to float when the pressure exerted by the ice (prescribed by the ice model) is equal to the pressure of the current sea level. Thus, floating occurs when sea level is positive in the absence of ice and

$$I_j < (SL_j + I_j) \frac{\rho_w}{\rho_i}. \quad (4)$$

Second, ocean-continent margins change with time to account for ice sheets replacing sea and vice versa, as well as the change in coastline as sea level rises next to a sloped coastline (see Kendall et al. 2005 and references therein). The change in coastline depends on the topography, which depends on the sea level change. This requires an iteration over the complete glacial cycle (the ‘outer’ iteration) on top of the Solving the sea level equation requires iteration to obtain the sea level change for each time step (the ‘inner’ iteration, denoted with index  $i$ ).

To start the outer iteration over the glacial cycle, the pre-glacial topography  $T_0$  is assumed to be equal to the present-day topography  $T_p$ . With this topography, sea level at each time step is computed. To start the inner iteration for each time step, an The initial guess for the change in ocean height is given by

$$\delta S_j^{i=0} = \delta h_j C_j - T_p (C_j - C_{j-1}) - \delta H_j \quad (5)$$

where  $h_i$  is the uniform change in ocean height given by mass conservation with the current ocean basin and  $C_i$  is the ocean function at time  $t_i$ .  $\delta$  denotes a change in one time step different from the total change denoted by  $\Delta$ . Note that the change in sediment thickness is subtracted here because it is included in the definition of sea level.

A change in topography affects the location of coastlines and hence the distribution of melt water. At first the pre-glacial topography  $T_0$  is assumed to be equal to the present day topography  $T_p$ . After computing sea level increments at all time steps, the topography is estimate can be improved using the total sea level rise:

$$T_0 = T_p + \Delta SL_p \quad (6)$$

With the improved pre-glacial topography, the computation of sea levels can be repeated (the ‘outer’ iteration) until the pre-glacial topography reaches convergence. Erosion will also change the topography, but this effect is not included; the effect of erosion on the location of coastlines is expected to be smaller than the loading changes of erosion and sediment deposition itself which are the main interest of this study.

To compute the change in equipotential surface and solid surface displacement the Earth’s mechanical properties need to be known. Here we assume the Earth is radially symmetric, incompressible, and deforming according to a Maxwell rheology. For such an earth model, response functions for an impulse load can be computed in the spherical harmonic domain (Peltier 1974). An efficient solution method presented by Mitrovica and Peltier (1991) solves the sea level (2) in the spatial domain

while computing the response of the solid Earth in the spectral domain. This method requires transformations from the spatial to the spectral domain where some information is lost.

The effect of sediment redistribution is implemented in the numerical codes for the sea-level equation developed by Schotman (2007). A partial benchmark against other numerical solutions of the sea-level equations was carried out in Spada et al. (2012). Rotational feedback is also included in the sea level equation following Wu and Peltier (1984) and Milne et al. (1998). The response of the Earth to surface loading for a radially symmetric Earth is computed with the multi-layer matrix propagation normal mode method (Vermeersen and Sabadini, 1997) which is benchmarked in Spada et al. (2011).

### 3. Model inputs

The computation requires several inputs, such as elastic parameters, the and-viscosity of the Earth, and the ice and sediment distributions, which are discussed in the following subsections. For the present day topography ETOPO5 is used. ~~Note that the computations of the sea level equation takes place in the spherical harmonic domain.~~ The maximum spherical harmonic degree of 256 and size of the grid of quantities that are provided in the spatial domain, such as topography and surface load, is 256x512.

#### 3.1 Model inputs: viscosity and ice loading

In this study we consider a laterally homogeneous Earth model and vary the radial viscosity profile. As a reference ~~model~~ profile we use VM5a (Peltier and Drummond, 2008) which is an iteration of the VM2 profile ~~model~~ that is used in the creation of ICE-5G (Peltier 2004). As alternative ~~models-profiles~~ we select ~~models-profiles~~ that have been shown by Root et al (2015b) to provide a good fit to sea level data, GPS and GRACE data in Fennoscandia ~~in Root et al. (2015b)~~. That study found two ~~model-sets~~ viscosity profiles, one with higher viscosities in upper and lower mantle viscosity and one with lower viscosities. The fact that sediment loading is not taken into account to obtain viscosity profiles in Root et al. (2015b) will have a minor effect given that three very different viscosity profiles are selected to account for uncertainty in viscosity. Out of those sets we select ~~the two models~~ M8-128-150 and M4-16-80, where the first number denotes the upper mantle viscosity in  $10^{20}$  Pa s, the second number denotes the lower mantle viscosity in  $10^{20}$  Pa s and the third number denotes the lithosphere thickness in km. The three viscosity profiles are shown in Fig. 1. Note the lower viscosity  $10^{22}$  Pa s in VM5a just below the lithosphere, from 60 to 100 km depth.

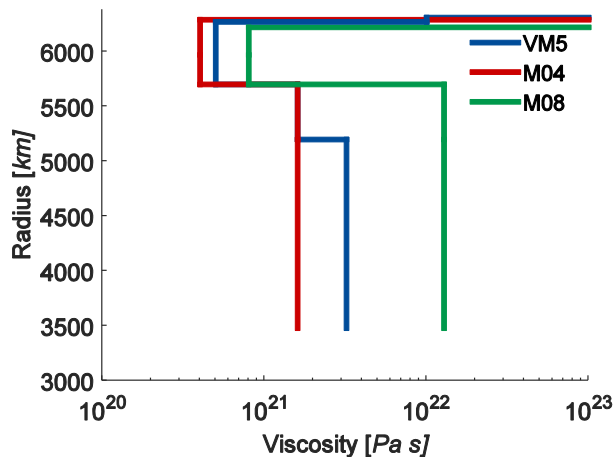

Figure 1: The three viscosity profiles used in this study. M04 refers to viscosity profile M4-16-80, M08 refers to M8-128-150.

Since we are only interested in the effect of GISR the exact ice loading history is of less importance, and only influences the effect of GISR through the distribution of meltwater possibly replaced by sediment, which is a smaller effect than the sediment loading itself. For ice loading history the ICE-5G model v1.2 (Peltier 2004) is selected which is provided with - Time steps are of 2,000 years from 120 kyr Before Present (B.P.) to 32 kyr B.P., 1,000 years from 32 to 17 kyr B.P. and 500 years from 17 kyr B.P. to present.

### 3.2 Model inputs: sediment distribution

In order to model the loading effect of GISR it needs to be known how much sediment is transported, where it came from and where it is deposited. Erosion and deposit estimates for entire-all of Scandinavia during the last glacial cycle are not readily available. Therefore, we created a map of sediment deposition from estimates in the literature of sediment volumes transported in smaller-local features: through mouth fans (TMFs) (i), large scale failures (ii) and basin flux (iii). Each of the features will be briefly discussed in the following.

(i) TMFs are places where rapid flowing ice streams at the end of the continental shelf converge, and where sediment is deposited off the shelf, see Figure 2 for the locations. Local observations come from sonar and seismic profiling (Dowdeswell et al., 1996) and coring (Saettem et al., 1992; Laberg and Vorren 1996; Taylor et al., 2002; Laberg et al., 2012). Other estimates come from modelling based on bathymetry, elevation and environmental conditions (Siegert and Dowdeswell 2002), but these are highly dependent on the amount of ice that is believed to have existed in the Barents and Kara Sea. Deposition also takes place on the shelf, but is probably smaller (Zieba et al. 2016)

The estimates are compiled in Table A1 in Appendix A.

(ii) Large scale failures represent the sediment that is displaced after collapse of the slope. The largest ~~of~~ such events related to the Eurasian ice sheet is the Storegga slide. Haflidason et al. (2004; 2005) estimate the Holocene event to have a volume

of 2400-3200 km<sup>3</sup> based on sonar scans and sedimentary cores. A compilation of the studies for this and other slides is provided in Table A2 in Appendix A.

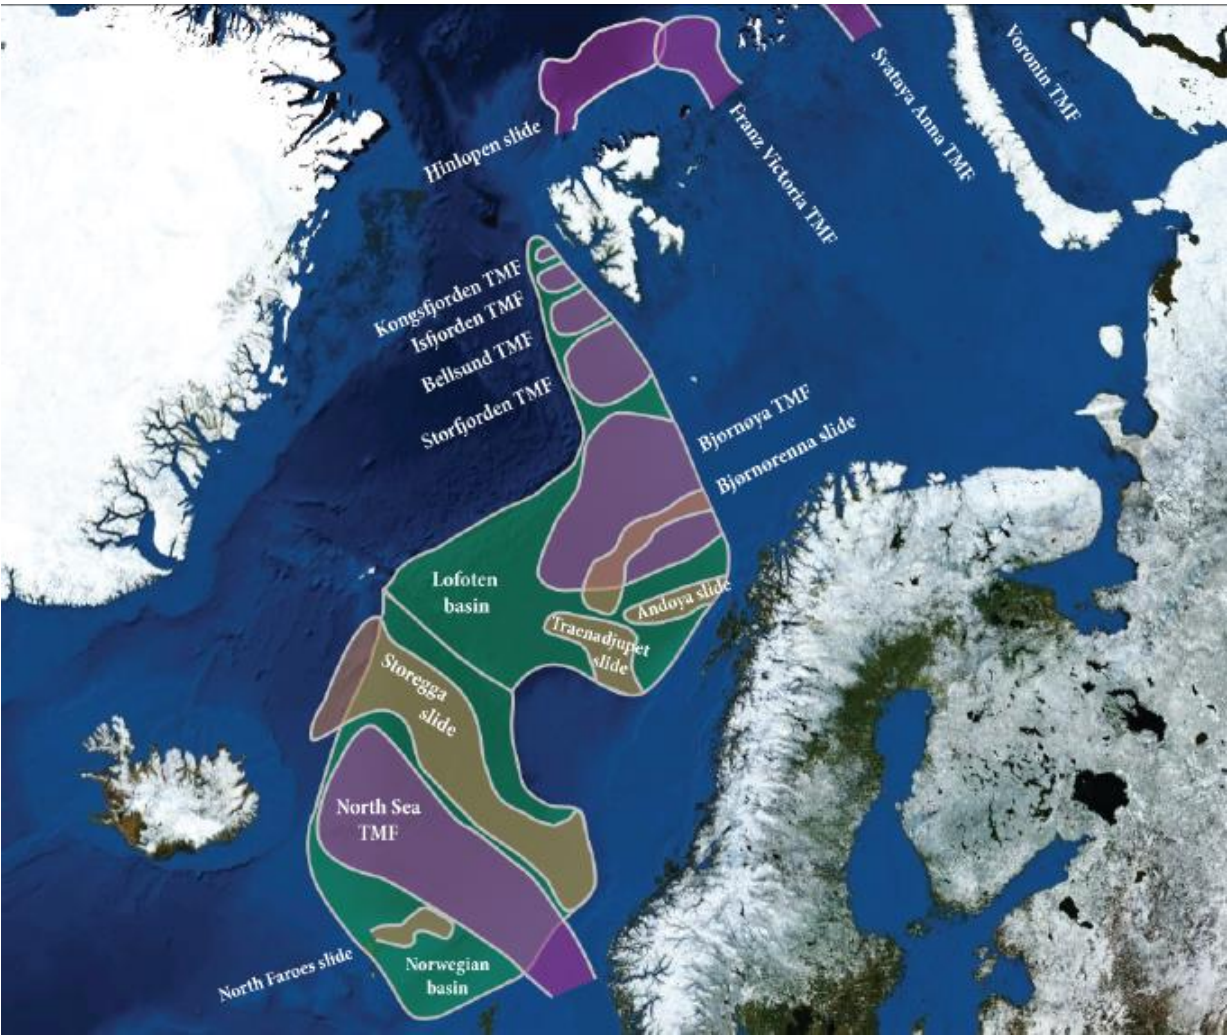

**Figure 2: Schematic representation of the locations of Through Mouth Fans (purple), Large scale failures (brown) and basins (green).**

(iii) The TMFs and the large-scale failure are examples of local features. However, constant deposition of sediment from the source area to the basins () also takes place. During glaciations, sediment activity is increased, with thickness changes estimated to be 5 cm kyr<sup>-1</sup> and 2 cm kyr<sup>-1</sup> for the periods of 30-10 kyr B.P. and 10-0 kyr B.P. respectively (Taylor et al., 2002), which amounts to a total volume of 97 and 58 km<sup>3</sup> for the Norwegian basin and 485 and 290 km<sup>3</sup> for the Lofoten basin. There are also channels and canyon systems that are not captured by either the large scale individual features which

still provide larger sedimentation rates than the overall basin estimate. Estimates for the Lofoten channel system amount to 35 km<sup>3</sup> (Taylor et al., 2000), which is small enough that it can be neglected compared to the other events. The basin fluxes are given in Table A3 in Appendix A.

Conflicting estimates are stated for GISR volumes in Tables A1-A3 in Appendix A, for example the Byørnøya Through Mouth Fan in Table A1. Also the timing is uncertain for most events. Therefore, different sets of GISR loads ~~awere~~ created, consisting of minimum, maximum and moderate estimates from the tables, which are labelled Sed1, Sed2 and Sed3, respectively. The time step is chosen to be the average of the time span given, rounded off to the nearest time step of the ice model. A value for sediment density of 2300 kg/m<sup>3</sup> is taken, in agreement with Amantov et al. (2008) and measurements for shallow sediments (Zaborska et al. 2008). Uncertainty in the density is likely smaller than the uncertainty in thickness and timing which are represented here by the different sediment models.

~~To create the spatial distribution of sediment contours were drawn in the QGIS software package, to match the figures in Taylor et al. (2002) and Winkelmann et al. (2008), see Figure 3. The resulting shape files were converted to raster files with sediment height for each grid point using MATLAB and GDAL. Across the source and sink areas of the sediments a uniform sediment height change is assumed so that the volume matches the estimates in Table B4. The areal extent is the largest source of uncertainty. To address this we looked for an alternative estimate of GISR.~~

~~The model of Amantov et al. (2011) couples ice sheet growth and erosion and is constrained by sedimentary and seismologic observations. Sediment removal and deposition is shown in Figure 4, which is figure 3.6 of Amantov et al. (2011). Because part of the data is proprietary, the data for the time series and also for creating the figure is not available. The software package QGIS was used to georeference the image and find the sediment thickness at hundreds of points between which triangular interpolation was performed. An average rock density of 2300 kg m<sup>-3</sup> was used to obtained sediment thickness values. The original model of Amantov et al. (2011) conserved mass, but in converting the graphics to a grid of sediment thickness values mass conservation was lost. We opted not to enforce mass conservation, as doing so would require further assumptions which introduce uncertainty. As a result there is a geoid shift of around 13 cm, which causes a loading effect that is small compared to sediment thickness changes. To obtain a time series of sediment thickness it is assumed that the temporal variation of sediment transport follows the total ice mass change, based on the fact that erosion rate is proportional to sliding speed, which is enhanced during melting (Herman et al., 2011).~~

~~Figure 3: location of erosion events, derived from Taylor et al. (2002) and Winkelmann et al. (2008).~~

~~Figure 4: Total Weichselian erosion and redistribution, figure copied from Amantov et al. (2011). The sediment load is converted to equivalent water thickness using average rock density. Note that the color scale is saturated at 300 m.~~

~~Figure 5: Screen shot of points captured in QGIS from Figure 4.~~

The color scale in Figure 4 is saturated at 300 m, and contour lines also stop there. To try and take into account that the distribution was higher at those locations, two models were created: one in which the cut off of 300 m was maintained (Amantov1), and one in which maximum thickness was set to 600 m and surrounding thicknesses interpolated from the edge of the 300 m cut off (Amantov2). The difference was small, but nevertheless results for both models will be used for the results. Finally, large scale failures, which are not included in the model of Amantov et al. (2011), are added from Table A2.

#### 4. Results

Figure 3 shows the displacement-RSL between LGM and present for sediment-viscosity profile model M4-16-80 together with the location of a selection of RSL sites from the Tushingham and Peltier (1992) database. The RSL mainly represents the solid Earth displacement. It can be seen that the largest subsidence caused by glacial sediment transport is off-shore, and the largest uplift is in the center of the continentbetween south Norway and Sweden. Hence the effect on coastal RSL data is limited. Another reason why the effect on RSL data is limited is that the GISR causes a difference in RSL that increases over time. Because sea level of current sites is set to zero, the largest difference occurs earlier in the deglaciation, which coincides with larger error bars on the data, if records are available at all. This can be seen in

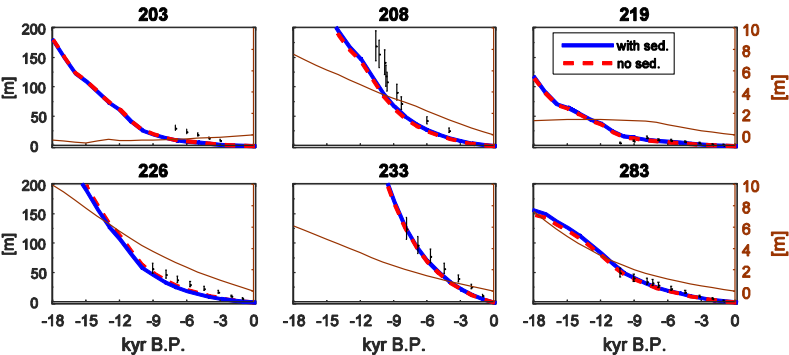

Figure 4 which shows the effect on RSL with and without GISR for the ICE-5G model in combination with the M4-16-80 Earth model. Differences are at the level of several meters, which is below or near the error bar. Values for the other sediment and earth models are given in Table 1. It can be seen that the Amantov model results in values that are a factor two or three larger.

| Max. RSL | Max. uplift rate       | Max. gravity rate | Max. gravity rate |
|----------|------------------------|-------------------|-------------------|
| [m]      | [mm yr <sup>-1</sup> ] | Scandinavia       | Barents Sea       |

|          |                 |                    | [ $\mu\text{Gal yr}^{-1}$ ] | [ $\mu\text{Gal yr}^{-1}$ ] |
|----------|-----------------|--------------------|-----------------------------|-----------------------------|
| Sed1     | 1.5   0.9   1.6 | 0.14   0.07   0.16 | 0.019   0.009   0.021       | 0.004   0.004   0.014       |
| Sed2     | 1.9   1.1   1.8 | 0.19   0.08   0.21 | 0.023   0.011   0.027       | 0.004   0.004   0.014       |
| Sed3     | 1.3   0.7   1.3 | 0.11   0.05   0.12 | 0.014   0.007   0.016       | 0.002   0.002   0.005       |
| Amantov1 | 4.1   2.5   4.5 | 0.38   0.28   0.47 | 0.030   0.052   -0.048      | 0.008   -0.016   0.014      |
| Amantov2 | 5.0/2.6/4.5     | 0.38/0.28/0.47     | 0.032/0.052/-0.050          | 0.007/-0.018/0.014          |

Table 1: maximum effect of sediment loading for different GISR estimates. In each cell the three numbers separated by | correspond to earth models M4-16-80/M8-128-150/VM5a, respectively. The maximum effect on relative sea level measurements is calculated as the maximum effect at any of the 6 sites of Figure 3 at the time at which there are measurements (shown with vertical bars in Figure 4). The uplift rate is interpolated at the GPS sites of the BIFROST network presented in Lidberg et al. (2010) and the maximum is shown. The maximum positive rate of change of gravitational acceleration gravity rate in Scandinavia is determined in the land area contained in the box with longitudes from 5° to 37° and latitudes from 55° N to 71° N, see Error! Reference source not found.. The maximum positive gravity rate in the Barents Sea is determined in the box with longitudes between 10° and 100° degrees, and latitudes between 71° N and 81° N.

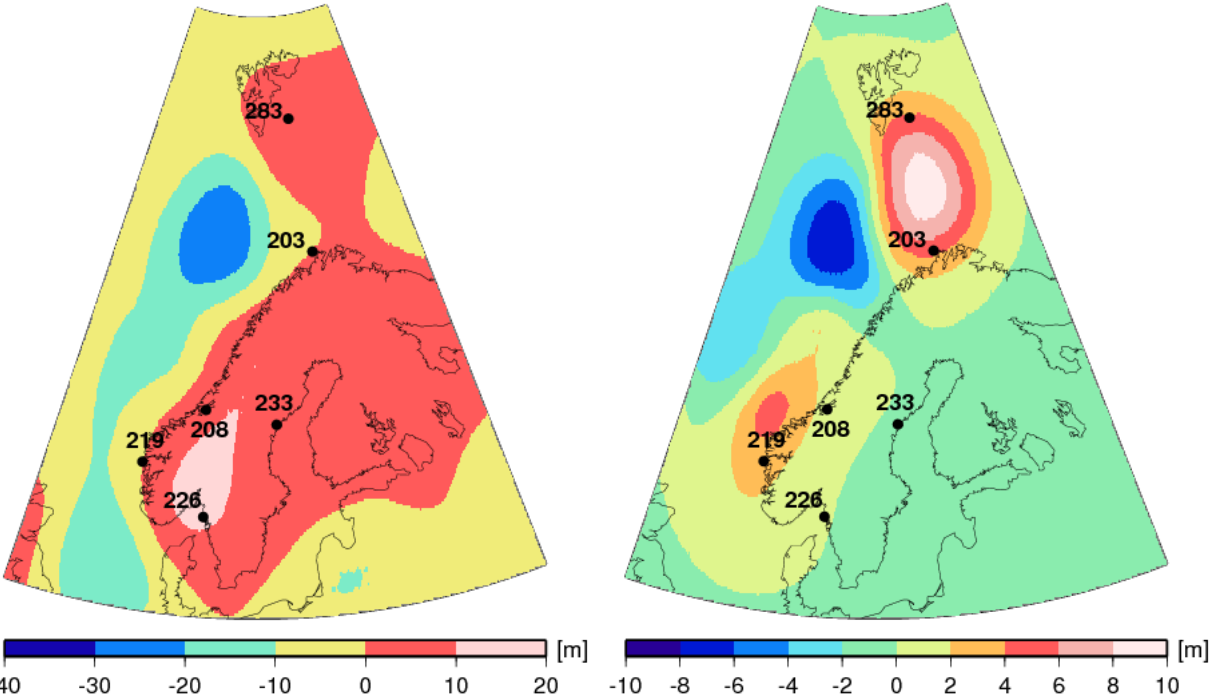

Figure 3: Colors denote the difference between RSL computed at LGM (26,000 years B.P. in the ICE-5G model) and computed at present caused by GISR for sediment model Amantov2 (left) and Sed1 (right). Note the different color scales. Numbered black dots show the locations of Relative Sea Level data used in Fig. 7. Earth model M4-16-80 is used for both cases.

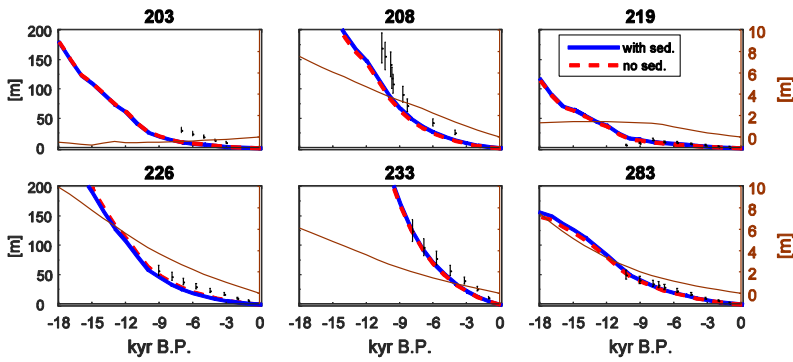

Figure 4: RSL at selected sites from the Tushingham and Peltier (1992) database, for the ICE-5G model (red **dashed** line) and the ICE-5G model with sediment transport (blue line) according to the Amantov<sup>2</sup> model in combination with the M4-16-80 Earth model. **The brown line shows the difference, with scale on the right y-axis.**

While the relative sea level over time also includes the geoid effect due to removed mass, the present-day uplift rate only represents the viscous readjustment due to past changes in surface loadings. The pattern of uplift rates is shown in Figure 5 for the Amantov<sup>2</sup> and Sed1 GISR models. In Figure 5a uplift can be seen in the formerly glaciated region of Scandinavia and subsidence off-shore, corresponding to . Figure 5b mainly shows the effect of large scale failures. In both figures, the largest effects are off-shore where no GPS measurements can be made. To see the effect on observed uplift rates, the second data column in Table 1 shows the maximum effect of the sediment loading at any of the BIFROST sites of Lidberg et al. (2010). GISR is seen to always increase uplift rates, because most of the GPS measurement stations are in previously glaciated areas from where erosion took place. Thus, **when GPS is used to draw conclusions on or validate glaciation history (e.g. Kierulf et al. 2014) the contribution of the ice may be overestimated. by interpreting the GPS rates as only resulting from ice unloading, the contribution from the ice is overestimated. This could result in biased inferences of ice thickness.**

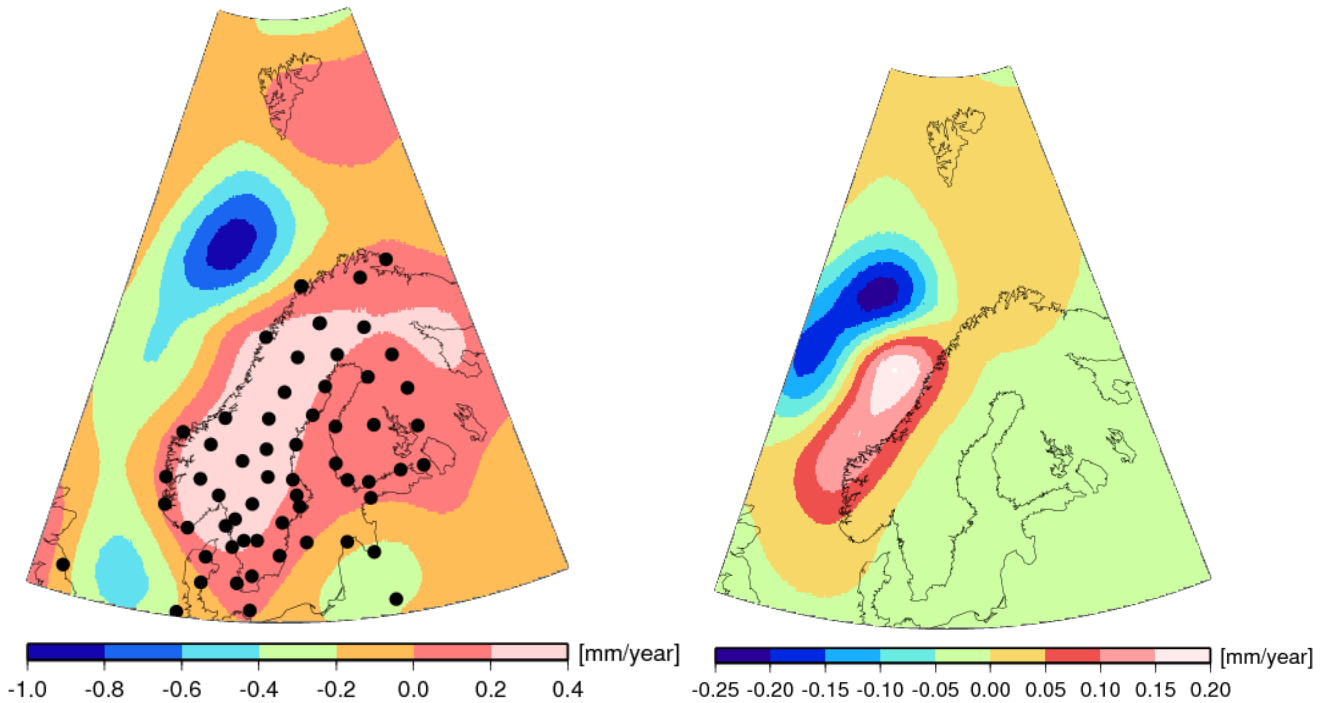

**Figure 5: Uplift rates caused by sediment redistribution according to GISR models Amantov<sup>12</sup> (left) and Sed1 (right). Dots denote locations of GPS sites of Lidberg et al. (2010). Note the different color scales. Earth model M4-16-80 is used for both cases.**

5 Finally, the influence on gravity rates is also investigated (Figure 6), as gravity rates derived from the GRACE satellite mission constrain GIA in Scandinavia (Steffen et al., 2008; van der Wal et al., 2011) and the Barents Sea (Root et al., 2015a). To compare with GRACE data a maximum spherical harmonic degree of 60 is used in the GIA model, which is the same truncation used in many GRACE studies. Similar to the uplift rate signal, Sed1 reflects the signal of the landslides off-shore southern Norway and the Amantov<sup>4</sup> model has negative gravity rates west of the Barents Sea where sediment is deposited. To evaluate the magnitude of the effect, Table 1 provides the maximum gravity rate that occurs in the areas that are used for GIA studies, Scandinavia and the Barents Sea, see ~~the caption of Table 1 for how the areas are defined~~ Figure 6. The values can be judged by comparing against the GRACE measurements error. The measurement error of the gravity rates derived from GRACE is computed using the method of Wahr et al. (2004), assuming that residuals obtained after fitting a trend, secular and annual signal to the monthly gravity fields reflect noise. This method was shown to results in a similar error magnitude as calibrated standard deviations or a full variance-covariance matrix (van der Wal et al., 2010). The measurement error propagated to the trend has a value of  $0.016 \mu\text{Gal yr}^{-1}$  for a ten-year GRACE time series from January 2003 to July 2013. In Scandinavia sediment loading results in gravity rates around-at the level of the measurement error for the Sed/2/3 models for the three Eearth models (between 0.002 and 0.014  $\mu\text{Gal yr}^{-1}$ ), and larger effects for the Amantov<sup>4</sup> model (between 0.007 and 0.027  $\mu\text{Gal yr}^{-1}$ ). However, gravity rates derived from GRACE are not only affected by

measurement error. Using data from different processing centers, and using different correction models results in a larger spread in the gravity rate than the measurement error. Based on a comparison with GPS data the RMS error was estimated to be 1 mm/year in terms of uplift rate (van der Wal et al. 2011), which is around 10% of the maximum uplift rates. Assuming most of this reflects GRACE errors, this means that the gravity rate error is roughly 0.1 microGal/year. In this light, the values in Table 1 appear to be insignificant, but the effect of sediment loading is systematic. This could affect the inference of a GIA signal from GRACE data in Scandinavia but less so in the Barents Sea where the GISR effect is smaller. Note that the direct attraction of the current rate of sedimentation in the Barents Sea is not included in our computations. The effect of current sediment transport could become relevant for GRACE studies and should be investigated in future studies. Sediment transport from the Barents Sea to the west would have the opposite effect on the gravity rate but as of yet sediment transport is not yet detected in GRACE measurements.

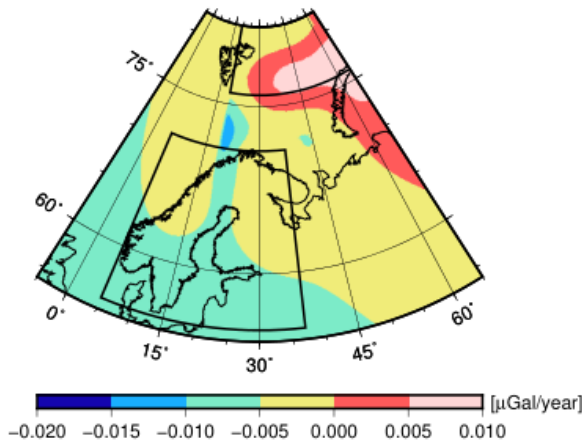

**Figure 6:** Gravity rate due to GISR according to the Amantov model for viscosity profile M4-16-80. Boxes in Scandinavia and the Barents Sea denote the areas for which the maximum gravity rate is given in Table 1.

## 5. Discussion and conclusions

We investigated the effect of sediment transport during the past glaciation in Scandinavia on current GIA observables. Although the amount of sediment transported is large, the effect on present-day GIA observables is small compared to the effect of ice loads that are displaced during glaciation, but comparable to water loading induced by ice sheet melt. Furthermore, sediment uptake takes place over a large area, and deposition takes place in limited areas mostly confined to the ocean which can lead to locally higher signal near areas of sediment deposition. It was found that RSL data are not significantly affected by GISR because those data are located near the shore, in between zones of erosion and deposition, and because a large part of the deposition takes place early in the deglaciation when the errors in RSL data are relatively large. At the LGM the effect is 18 m; at 6 kyear B.P. the effect is below 2 m, comparable to what was found for the Indus River basin (Ferrier et al. 2015).

Also, the effect on present-day uplift rate and gravity rates is limited; depending on the estimate for sediment transport that is used, the magnitude of GISR loading effects is near the measurement limit, several tenths of  $\text{mm yr}^{-1}$  uplift rate and several tenths of  $\mu\text{Gal yr}^{-1}$  gravity rate. The magnitude is comparable to a recent estimate of subsidence in the Mississippi delta (Yu et al. 2012; Wolstencroft et al. 2014) but somewhat smaller because of the larger sediment deposition area for the Fennoscandian ice sheet, and the earlier demise of the ice sheet in the Barents Sea. The magnitude is smaller than a possible reference frame bias in GPS derived uplift rates, and in the presence of other GIA model uncertainties several tenths of mm/year does not appear to be significant. However-Nevertheless, the effect is systematic, reducing uplift rates and gravity rates in the land areas of Fennoscandia and ~~Nova Zembla~~Svalbard and increasing gravity rates west of Fennoscandia and the Barents Sea. Thus, if uplift or gravity rates are used to infer viscosity profiles or ice thickness those estimates could be biased. Also, a few tenths of mm/year is not negligible compared to global average sea level change.

Lateral variations in earth properties could affect the conclusions. The eastern part of Scandinavia is part of a craton, which manifests in large crustal thickness and higher seismic velocities, which extend to the Barents Sea as seen in seismic measurements (see e.g. Schaeffer and Lebedev, 2013). The large seismic velocities likely result ~~from~~ high viscosity underneath eastern Scandinavia and the Barents Sea (e.g. van der Wal et al., 2013) which could reduce the present-day uplift rate in East Scandinavia and the Barents Sea (Kaufmann and Wu, 1997), but could increase the uplift rate west of Norway.

To correct uplift and gravity rates for the effects of GISR it is necessary that more accurate estimates of sediment transport are made, including variations in sediment density (Blum et al. 2008; Ferrier et al. 2015), or that ice loading histories currently used in GIA models are coupled with models for erosion and sediment processes. ~~We~~ suggest to investigate the effect of GISR in other areas where last glacial ice caps were located close to the continental shelf and GISR is expected to be large, such as Antarctica and Alaska.

## Acknowledgements

We thank Anthony Purcell, Matt King and three anonymous reviewers for their constructive reviews. We ~~thank~~ acknowledge Riccardo Riva and Roland Klees for comments at an earlier stage of this work and -Aleksey Amantov and Willy Fjeldskaar for providing more information on their model.

## Competing interests

The authors declare that they have no conflict of interest.

## References

- Amantov, A., Fjeldskaar, W., and Cathles, L.: Glacial Erosion/Sedimentation of the Baltic Region and the Effect on the Postglacial Uplift, in *The Baltic Sea Basin*, edited by J. Harff, S. Björck and P. Hoth, pp. 53-71, Springer Berlin Heidelberg, Berlin, Heidelberg, doi:10.1007/978-3-642-17220-5\_3, 2011.
- 5 Barletta, V. R. and Bordoni A.: Effect of different implementations of the same ice history in GIA modeling, *Journal of Geodynamics*, 71, 65-73, doi:http://dx.doi.org/10.1016/j.jog.2013.07.002, 2013.
- [Blum, M.D., Tomkin, J.H., Purcell, A., Lancaster, R.R.: Ups and downs of the Mississippi Delta. \*Geology\* 36, 675–678, 2008.](#)
- Boulton, G.S.: Theory of glacial erosion, transport and deposition as a consequence of subglacial sediment deformation.
- 10 *Journal of Glaciology*, 42(140), 43-62, 1996.
- Dalca, A. V., Ferrier, K. L., K. L. Mitrovica, J. X., Perron, J. T., Milne, G. A., and Creveling, J. R.: On postglacial sea level—III. Incorporating sediment redistribution, *Geophysical Journal International*, 194(1), 45-60, doi:10.1093/gji/ggt089, 2013.
- de Winter, I.L., Storms, J.E. and Overeem, I., Numerical modeling of glacial sediment production and transport during
- 15 deglaciation. *Geomorphology*, 167, 102-114, 2012.
- Dowdeswell, J., Kenyon, N., Elverhøi, A., Laberg, J. , Hollender, F.-J. , Mienert, J. and Siegert, M.: Large-scale sedimentation on the glacier-influenced polar north atlantic margins: Long-range side-scan sonar evidence. *Geophysical Research Letters*, 23 (24), 3535-3538, 1996.
- Elverhøi, A.: Glacigenic and associated marine sediments in the Weddell Sea, fjords of Spitsbergen and the Barents Sea: a
- 20 review. *Marine Geology*, 57(1-4), 53-88, 1984.
- [Fairbanks, R.G., 1989. A 17, 000-year glacio-eustatic sea level record: influence of glacial melting rates on the Younger Dryas event and deep-ocean circulation. \*Nature\*, 342\(6250\), pp.637-642.](#)
- Farrell, W. E., and Clark, J. A.: On postglacial sea-level, *Geophys. J. Roy. astr. Soc.*, 46, 647-667, 1976.
- Ferrier, K. L., Mitrovica, J. X., Giosan, L., and Clift, P. D.: Sea-level responses to erosion and deposition of sediment in the
- 25 Indus River basin and the Arabian Sea, *Earth and Planetary Science Letters*, 416, 12-20, doi:http://dx.doi.org/10.1016/j.epsl.2015.01.026, 2015.
- Finlayson, A.G.: Ice dynamics and sediment movement: last glacial cycle, Clyde basin, Scotland. *Journal of Glaciology*, 58(209), 487-500, 2012.
- Haflidason, H., Lien, R., Sejrup, H.P., Forsberg, C.F., and Bryn P.: The dating and morphometry of the storegga slide.
- 30 *Marine and Petroleum Geology*, 22 (1), 123-136, 2005.
- Haflidason, H., et al.: The storegga slide: architecture, geometry and slide development. *Marine Geology*, 213 (1), 201-234, 2004.

- Hallet, B., Hunter, L. and Bogen, J.: Rates of erosion and sediment evacuation by glaciers: A review of field data and their implications. *Global and Planetary Change*, 12(1), 213-235, 1996.
- Herman, F., Beaud, F., Champagnac, J.-D, Lemieux, J.-M, and Sternai, P.: Glacial hydrology and erosion patterns: A mechanism for carving glacial valleys. *Earth and Planetary Science Letters*, 310 (3), 498-508, 2011.
- 5 [Herman, F., Beyssac, O., Brughelli, M., Lane, S.N., Leprince, S., Adate, T., Lin, J.Y., Avouac, J.P. and Cox, S.C.: Erosion by an Alpine glacier. \*Science\*, 350\(6257\), pp.193-195, 2015.](#)
- Hildes, D.H., Clarke, G.K., Flowers, G.E. and Marshall, S.J.: Subglacial erosion and englacial sediment transport modelled for North American ice sheets. *Quaternary Science Reviews*, 23(3), 409-430, 2004.
- Ivins, E.R., Dokka, R.K., and Blom, R.G.: Post-glacial sediment load and subsidence in coastal Louisiana, *Geophysical Research Letters*, 34(16), L16303, doi:10.1029/2007GL030003, 2007.
- 10 Kaufmann, G., and Wu, P.: Lateral asthenospheric viscosity variations and postglacial rebound: a case study for the Barents Sea." *Geophysical Research Letters* 25(11) 1963-1966, 1998
- Kendall, R. A., Mitrovica, J. X., and Milne G. A.: On post-glacial sea level - II. Numerical formulation and comparative results on spherical symmetric models, *Geophysical Journal International*, 161, 679-706, 2005.
- 15 [Kierulf, H. P., Steffen, H., Simpson, M. J. R., Lidberg, M., Wu, P., Wang, H.: A GPS velocity field for Fennoscandia and a consistent comparison to glacial isostatic adjustment models, \*Journal of Geophysical Research: Solid Earth\*, 119\(8\), 6613-6629, 2014.](#)
- Laberg, J. and Vorren, T.: The middle and late pleistocene evolution and the bear island trough mouth fan. *Global and Planetary Change*, 12 (1), 309-330, 1996.
- 20 Laberg, J. S., Andreassen, K., and Vorren, T.O.: Late cenozoic erosion of the highlatitude southwestern barents sea shelf revisited. *Geological Society of America Bulletin*, 124 (1-2), 77-88, 2012.
- Lidberg, M., Johansson, J.M., Scherneck, H.-G, and Milne, G.A.: Recent results based on continuous GPS observations of the GIA process in Fennoscandia from BIFROST, *Journal of Geodynamics*, 50(1), 8-18, 2010.
- Milne, G. A., and Mitrovica, J.X.: Postglacial sea-level change on a rotating Earth, *Geophysical Journal International*, 133, 1-19, 1998.
- 25 Mitrovica, J. X., and Peltier, W.R.: On Postglacial Geoid Subsidence Over the Equatorial Oceans, *Journal of Geophysical Research*, 96, 20,053-20,071, 1991.
- [Peltier, W. R. \(1974\), The impulse response of a Maxwell Earth, \*Reviews of Geophysics and Space Physics\*, 12, 649-669.](#)
- Peltier, W.R.: Global glacial isostasy and the surface of the ice-age Earth: the ICE-5G (VM2) model and GRACE. *Annu. Rev. Earth Planet. Sci.*, 32, pp.111-149, 2004.
- 30 Peltier, W. R., and Drummond, R.: The rheological stratification of the lithosphere: A direct inference based upon the geodetically observed pattern of the glacial isostatic adjustment of the North American continent, *Geophys. Res. Lett.*, 35, L16314, doi:10.1029/2008GL034586, 2008.

- Riis, F. and Fjeldskaar, W.: On the magnitude of the Late Tertiary and Quaternary erosion and its significance for the uplift of Scandinavia and the Barents Sea. Structural and tectonic modelling and its application to petroleum geology, 1, 163-185, 1992.
- Root, B.C., Tarasov, L., and van der Wal, W.: GRACE gravity observations constrain Weichselian ice thickness in the Barents Sea, *Geophysical Research Letters* 42.9, 3313-3320, 2015a.
- Root, B. C., van der Wal, W., Novák, P., Ebbing, J., and Vermeersen, L. L. A.: Glacial isostatic adjustment in the static gravity field of Fennoscandia, *Journal of Geophysical Research: Solid Earth*, 120(1), 2014JB011508, doi:10.1002/2014JB011508, 2015b.
- Sættem, J., Poole, D., Ellingsen, L., and Sejrup, H.: Glacial geology of outer bjørnøyrenna, southwestern barents sea. *Marine Geology*, 103 (1), 15-51, 1992.
- Schaeffer, A. J., and Lebedev, S.: Global shear speed structure of the upper mantle and transition zone, *Geophysical Journal International*, 194(1), 417-449, doi:10.1093/gji/ggt095, 2013.
- Schotman, H.H.A.: Shallow-Earth Rheology from Glacial Isostasy and Satellite Gravity, a sensitivity analysis for GOCE. PhD thesis, Delft University of Technology, 2007.
- Siegert, M. and Dowdeswell, J.: Late weichselian iceberg, surface-melt and sediment production from the eurasian ice sheet: results from numerical ice-sheet modelling. *Marine Geology*, 188(1), 109-127, 2002.
- ~~Simms, A. R., Anderson, J. B., DeWitt, R., Lambeck, K., and Purcell, A.: Quantifying rates of coastal subsidence since the last interglacial and the role of sediment loading, *Global and Planetary Change*, 111, 296-308, doi:http://dx.doi.org/10.1016/j.gloplacha.2013.10.002, 2013.~~
- Solheim, A., Russwurm, L., Elverhøi, A. and Berg, M.N.: Glacial geomorphic features in the northern Barents Sea: direct evidence for grounded ice and implications for the pattern of deglaciation and late glacial sedimentation. *Geological Society, London, Special Publications*, 53(1), pp.253-268, 1990.
- Spada, G., Barletta, V.R., Klemann, V., Riva, R.E.M., Martinec, Z., Gasperini, P., Lund, B., Wolf, D., Vermeersen, L.L.A. and King, M.A.: A benchmark study for glacial isostatic adjustment codes. *Geophysical Journal International*, 185(1), pp.106-132, 2011.
- Spada, G., Barletta, V.R., Klemann, V., van der Wal, W., James, T.S., Simon, K., Riva, R.E.M., Martinec, Z., Gasperini, P., Lund, B. and Wolf, D.: Benchmarking and testing the "Sea Level Equation. In *EGU General Assembly Conference Abstracts* (Vol. 14, p. 9773), 2012.
- Steffen, H., Denker, H., and Müller, J.: Glacial isostatic adjustment in Fennoscandia from GRACE data and comparison with geodynamical models, *Journal of Geodynamics*, 46(3-5), 155-164, 2008.
- Stein, R., and Macdonald, R.W.: Organic Carbon Budget: Arctic Ocean vs. Global Ocean, in *The Organic Carbon Cycle in the Arctic Ocean*, edited by R. Stein and R. W. MacDonald, pp. 315-322, Springer Berlin Heidelberg, Berlin, Heidelberg, doi:10.1007/978-3-642-18912-8\_8, 2004.

- Taylor, J., Dowdeswell, J., and Kenyon, N.: Canyons and late quaternary sedimentation on the north norwegian margin. *Marine Geology*, 166 (1), 1-9, 2000.
- Taylor, J., Dowdeswell, J., and Siegert, M.: Late weichselian depositional processes, fluxes, and sediment volumes on the margins of the norwegian sea (62-75). *Marine Geology*, 188 (1), 61-77, 2002.
- 5 [Tucker, G.E. and Slingerland, R.: Drainage basin responses to climate change. \*Water Resources Research\*, 33\(8\), pp.2031-2047, 1997.](#)
- Tushingham, A. M., and Peltier, W.R.: Validation of the ICE-3G Model of Würm-Wisconsin Deglaciation Using a Global Data Base of Relative Sea Level Histories, *J. Geophys. Res.*, 97(B3), 3285-3304, 1992.
- van der Wal, W., Rangelova, E., Sideris, M., and Wu, P.: Secular geoid rate from grace for vertical datum modernization. *Gravity, Geoid and Earth Observation*, Springer, 611-617, doi:10.1007/978-3-642-10634-7\_81, 2010.
- 10 van der Wal, W., Kurtenbach, E., Kusche, J., and Vermeersen, B.: Radial and tangential gravity rates from GRACE in areas of glacial isostatic adjustment, *Geophysical Journal International*, 187(2), 797-812, doi:10.1111/j.1365-246X.2011.05206.x, 2011.
- van der Wal, W., Barnhoorn, A., Stocchi, P., Gradmann, S., Wu, P., Drury, M., and Vermeersen, B.: Glacial isostatic adjustment model with composite 3-D Earth rheology for Fennoscandia, *Geophysical Journal International*, 194(1), 61-77, doi:10.1093/gji/ggt099, 2013.
- 15 Vermeersen, L. L. A., and Sabadini, R.: A new class of stratified viscoelastic models by analytical techniques, *Geophysical Journal International*, 129, 531-570, 1997.
- Wahr, J., Swenson, S., Zlotnicki, V., and Velicogna, I.: Time-variable gravity from GRACE: First results, *Geophys. Res. Lett.*, 31(11), L11501, doi:10.1029/2004gl019779, 2004.
- 20 Winkelmann, D., Geissler, W. , Schneider, J., R. Stein, R.: Dynamics and timing of the hinlopen/yermaak megaslide north of Spitsbergen, Arctic Ocean. *Marine Geology*, 250(1), 34-50, 2008.
- Wolstencroft, M., Shen, Z., Törnqvist, T.E., Milne, G.A. and Kulp, M.: Understanding subsidence in the Mississippi Delta region due to sediment, ice, and ocean loading: Insights from geophysical modeling. *Journal of Geophysical Research: Solid Earth*, 119(4), pp.3838-3856, 2014.
- 25 Wu, P., and Peltier, W.R.: Pleistocene deglaciation and the Earth's rotation: a new analysis, *Geophysical Journal of the Royal Astronomical Society*, 76, 753-791, 1984.
- [Yu, S.Y., Törnqvist, T.E. and Hu, P.: Quantifying Holocene lithospheric subsidence rates underneath the Mississippi Delta. \*Earth and Planetary Science Letters\*, 331, pp.21-30, 2012.](#)
- 30 Zaborska, A., Carroll, J., Papucci, C., Torricelli, L., Carroll, M. L., Walkusz-Miotk, J., and Pempkowiak, J.: Recent sediment accumulation rates for the Western margin of the Barents Sea, *Deep Sea Research Part II: Topical Studies in Oceanography*, 55(20–21), 2352-2360, doi:http://dx.doi.org/10.1016/j.dsr2.2008.05.026, 2008.
- [Zieba, K., Felix, M., Knies, J.: The Pleistocene contribution to the net erosion and sedimentary conditions in the outer Bear Island Trough, western Barents Sea. \*Arktos\* 2, 1-17, 2016.](#)

|

Appendix A: estimates of sediment displacement

| Through Mouth Fan | Volume<br>[km <sup>3</sup> ] | Timespan<br>[ka B.P.] | Reference                     |
|-------------------|------------------------------|-----------------------|-------------------------------|
| Bellsund          | --                           | -                     | -                             |
| Byørnøya          | 820-1100                     | 22-17                 | Taylor et al. (2002)          |
|                   | 1360                         | 21.5-17.5             | Laberg et al. (2012)          |
|                   | 2700                         | 30-8                  | Siegert and Dowdeswell (2002) |
|                   | 4176                         | Late Weichselian      | Laberg and Vorren (1996)      |
|                   | 4800                         | 27-14                 | Dowdeswell and Siegert (1999) |
| Franz Victoria    | 500                          | 30-8                  | Siegert and Dowdeswell (2002) |
| Isfjorden         | 22.5                         | 30-0                  | Elverhoi et al. (1995)        |
| Kongsfjorden      | -                            | -                     | -                             |
| North Sea         | 800                          | 30-0                  | Taylor et al. (2002)          |
| Storfjorden       | 250                          | 30-0                  | Siegert and Dowdeswell (1999) |
|                   | 800                          | 27-14                 | Dowdeswell and Siegert (1999) |
| Svyataya Anna     | Little                       | 30-8                  | Siegert and Dowdeswell (1999) |
|                   | 2200                         | 27-14                 | Dowdeswell and Siegert (1999) |
| Voronin           | little                       | 30-8                  | Siegert and Dowdeswell (1999) |

**Table A2: estimates for volume of sediment displaced in different events, timespan and reference. No estimates for the Bellsund and Kongsfjorden are available, but sediment transport there is expected to be relatively small.**

| Large Scale Failure | Volume<br>[km <sup>3</sup> ] | Timespan<br>[ka B.P.] | Source                   |
|---------------------|------------------------------|-----------------------|--------------------------|
| Andøya              | 900                          | 11-0                  | Taylor et al. (2002)     |
| Byørnøyenna         | 1350                         | 20-15                 | Leynaud et al. (2009)    |
| Hinlopen            | 1200-1350                    | 30                    | Winkelmann et al. (2008) |
| North Faroes        | 135-1700                     | 9.85                  | Taylor et al. (2002)     |
| Storegga I          | 3880                         | 50-30                 | Bugge et al. (1988)      |
| Storegga II-III     | 1700                         | 8-6                   | Bugge et al. (1988)      |
| Storegga II-III     | 2400-3200                    | 7.25                  | Haflidason et al. (2005) |
| Traenadjupet        | 900-1900                     | 4.2                   | Taylor et al. (2002)     |

**Table A3: Estimates for volume of sediment displaced by large scale failures.**

|                   | Rate    | Volume             | Timespan  | Reference            |
|-------------------|---------|--------------------|-----------|----------------------|
|                   | [cm\ka] | [km <sup>3</sup> ] | [ka B.P.] |                      |
| Norwegian basin   | 2       | 58                 | 10        | Taylor et al. (2002) |
| Lofoten basin     | 2       | 97                 | 10        | Taylor et al. (2002) |
| Norwegian basin   | 5       | 290                | 20        | Taylor et al. (2002) |
| Lofoten basin     | 5       | 485                | 20        | Taylor et al. (2002) |
| Norwegian channel | -       | 35                 | 30-0      |                      |

**Table A4: estimates for volume of sediment displaced in the Lofoten and Norwegian basins and channel systems.**

|                                   | Sed3 <u>(max)</u>  | Sed1 <u>(min)</u>  | Sed2 <u>(moderate)</u> |                  |
|-----------------------------------|--------------------|--------------------|------------------------|------------------|
| <b>TMF</b>                        | <b>Volume</b>      | <b>Volume</b>      | <b>Volume</b>          | <b>Time span</b> |
|                                   | [km <sup>3</sup> ] | [km <sup>3</sup> ] | [km <sup>3</sup> ]     | [ka B.P.]        |
| Byørnøya                          | 820                | 1360               | 4800                   | 22-17            |
| North Sea                         | 800                | 800                | 800                    | 30-0             |
| Storfjorden                       | 250                | 300                | 800                    | 27-14            |
| Franz Victoria                    | 500                | 500                | 500                    | 30-8             |
| Svyataya Anna                     | 100                | 250                | 2200                   | 27-14            |
| <b>Large Scale Failure</b>        | <b>Volume</b>      | <b>Volume</b>      | <b>Volume</b>          | <b>Time span</b> |
|                                   | [km <sup>3</sup> ] | [km <sup>3</sup> ] | [km <sup>3</sup> ]     | [ka BP]          |
| Andøya                            | 900                | 900                | 900                    | 8                |
| Bjørnøyrenna                      | 1350               | 1350               | 1350                   | 18               |
| North Faroes                      | 135                | 1400               | 1700                   | 10               |
| Storegga                          | 1700               | 2400               | 3200                   | 7                |
| Traenadjupet                      | 900                | 1900               | 1900                   | 4                |
| Hinlopen                          | 1200               | 1275               | 1350                   | 30               |
| <b>Basin fluxes</b>               | <b>Volume</b>      | <b>Volume</b>      | <b>Volume</b>          | <b>Timespan</b>  |
|                                   | [km <sup>3</sup> ] | [km <sup>3</sup> ] | [km <sup>3</sup> ]     | [ka BP]          |
| Norwegian basin<br>(interglacial) | 58                 | 58                 | 58                     | 9-0              |
| Lofoten basin<br>(interglacial)   | 97                 | 97                 | 97                     | 9-0              |

|                        |       |     |     |     |       |
|------------------------|-------|-----|-----|-----|-------|
| Norwegian<br>(glacial) | basin | 290 | 290 | 290 | 30-10 |
| Lofoten<br>(glacial)   | basin | 485 | 485 | 485 | 30-10 |
| Channel                |       | 35  | 35  | 35  | 30-0  |

**Table A5: sediment estimates created from observations and estimates of individual estimates in tables A1 to A3, as described in the main text. Sed2 and 3 are the maximum and minimum models, respectively.**

|

### **Appendix B.1: creation of spatial pattern from reported sediment displacement features**

To create the spatial distribution of erosion event shapes were drawn in the QGIS software package to match the figures in Taylor et al. (2002) and Winkelmann et al. (2008), see figure B.1. The shape files were converted to raster files with a sediment height for each point in the 256x512 spatial grid using MATLAB and GDAL. Across the source and sink areas of the sediments a uniform sediment height change is assumed so that the volume matches the estimates in Table A4. The areal extent is the largest source of uncertainty. Note that in reality deposition depends on distance from the source and also the area of deposition changes when the continental shelf is flooded or exposed (see e.g. Ferrier et al. 2015). In this study we opted to address the largest sources of uncertainty by using two independent estimates of GISR and three different Earth viscosity profiles.

### **Appendix B.2: creation of spatial pattern from reported sediment displacement features**

The model of Amantov et al. (2011) couples ice sheet growth and erosion and is constrained by sedimentary and seismologic observations. The model accounts for enhanced erosion due to ice streams and erodability of various sub-ice surfaces among others. Sediment removal and deposition is shown in figure 3.6 of Amantov et al. (2011) in equivalent water thickness. Because part of the data is proprietary, the data for the time series and for creating the figure is not available. The software package QGIS was used to georeference the image and digitize the load at hundreds of points between which triangular interpolation was performed (figure B.2). The original model of Amantov et al. (2011) conserved mass, but in converting the graphics to a grid of sediment thickness values mass conservation was lost. We opted not to enforce mass conservation, as doing so would require further assumptions which introduce uncertainty. As a result there is a total geoid shift of around 13 cm over the glaciation, which causes a loading effect that is small compared to sediment thickness changes. To obtain a time series of sediment thickness it is assumed that the temporal variation of sediment transport follows that of total ice mass change, based on the common assumption that erosion rate is proportional to sliding velocity (see Herman et al., 2011). Recently, erosion has been found to be proportional to sliding velocity squared (Herman et al. 2015), which would enhance erosion rate during periods of largest ice change compared to our erosion history.

The color scale in 3.6 of Amantov et al. (2011) appears to be saturated at 300 m, but in fact 300 m is the best guess by Amantov et al. (2011) for maximum sediment deposition thickness and it set as maximum deposition in the modelling (Aleksey Amantov, personal communication). Finally, the large-scale failures for Sed1 from table A.5, which are not included in the model of Amantov et al. (2011), are added from Table A2.

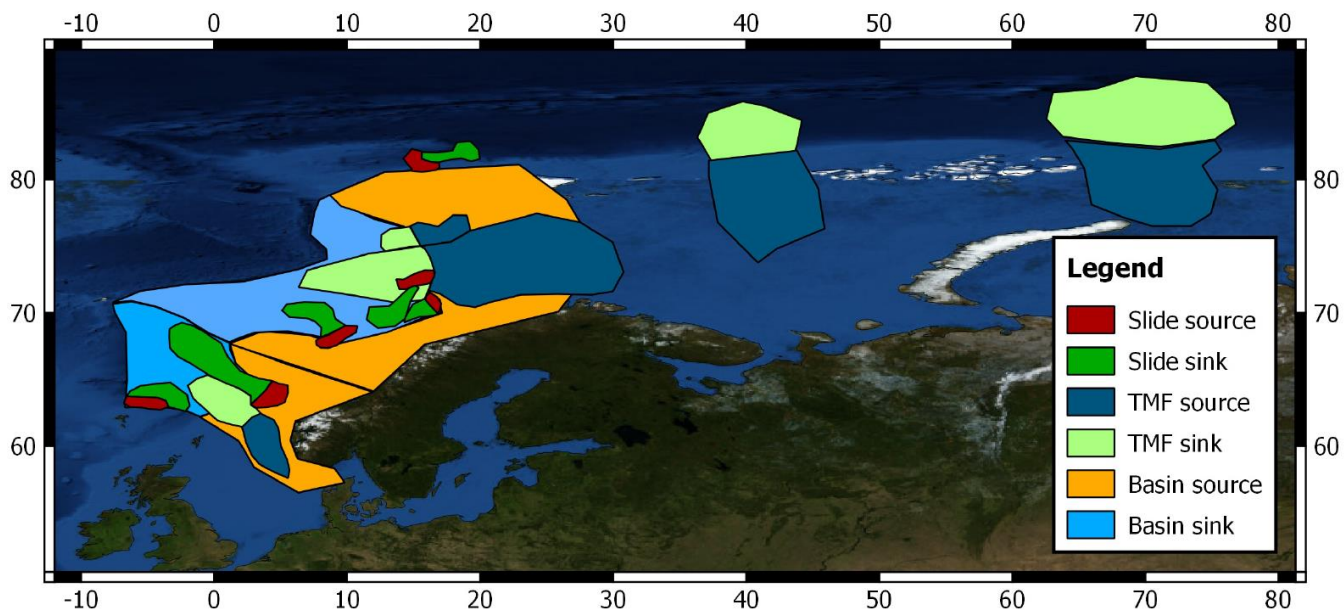

**Figure B.1: shape of erosion events, derived from Taylor et al. (2002) and Winkelmann et al. (2008).**

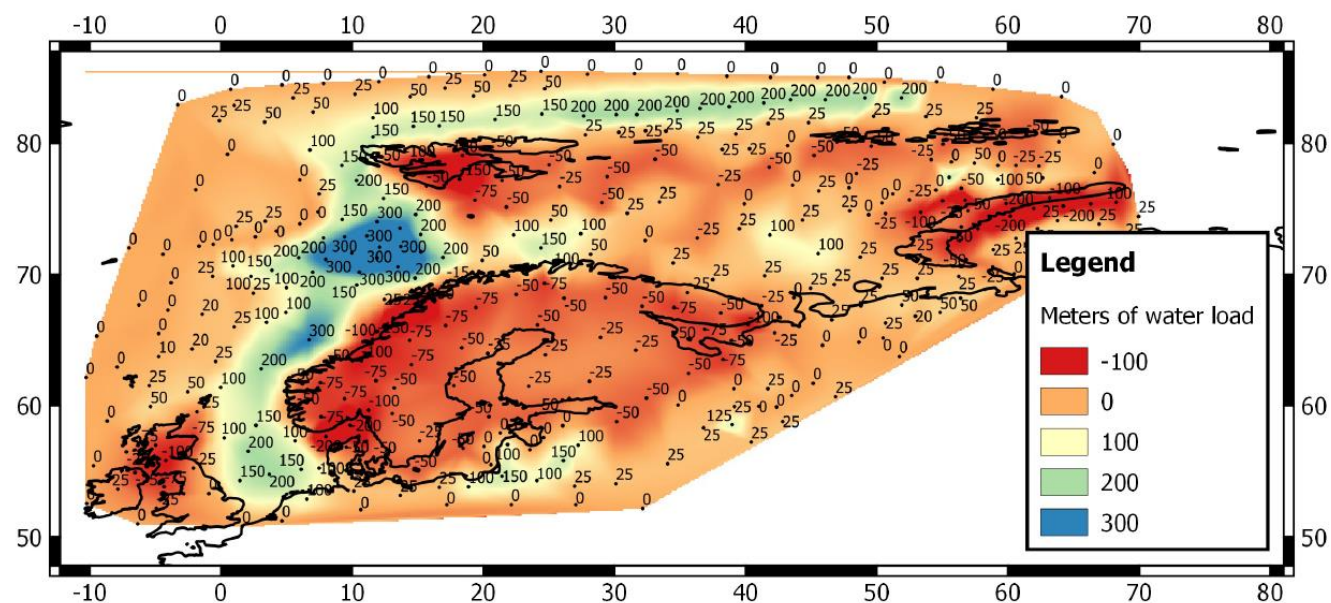

**Figure B.2: Points captured in QGIS from Amantov et al. (2011) with value of sediment load expressed in meters of water load. Values of the points are interpolated using splines.**
